# Supplementary material
Source: publisher figshare collection journal article supplement (https://acs.figshare.com/ndownloader/files/4447870)
Supplement: Supplementary file 1 [file 4447870]

# Size-Dependent Temperature Effects on PbSe Nanocrystals

**Quanqin Dai,<sup>†,‡</sup> Yu Zhang,<sup>†,||</sup> Yingnan Wang,<sup>§</sup> Michael Z. Hu,<sup>‡</sup> Bo Zou,<sup>\*,§</sup> Yiding Wang,<sup>||</sup> and  
William W. Yu<sup>\*,†,||</sup>**

<sup>†</sup> Department of Chemistry and Biochemistry, Worcester Polytechnic Institute, Worcester, Massachusetts 01609, USA

<sup>‡</sup> Nuclear Science and Technology Division, Oak Ridge National Laboratory, Oak Ridge, Tennessee 37831, USA

<sup>§</sup> State Key Laboratory of Superhard Materials, Jilin University, Changchun 130012, China

<sup>||</sup> State Key Laboratory on Integrated Optoelectronics, College of Electronic Science and Engineering, Jilin University, Changchun 130012, China

\* Corresponding authors: [wyu@wpi.edu](mailto:wyu@wpi.edu) (W. W. Yu); [zoubo@jlu.edu.cn](mailto:zoubo@jlu.edu.cn) (B. Zou).

## Supporting Information

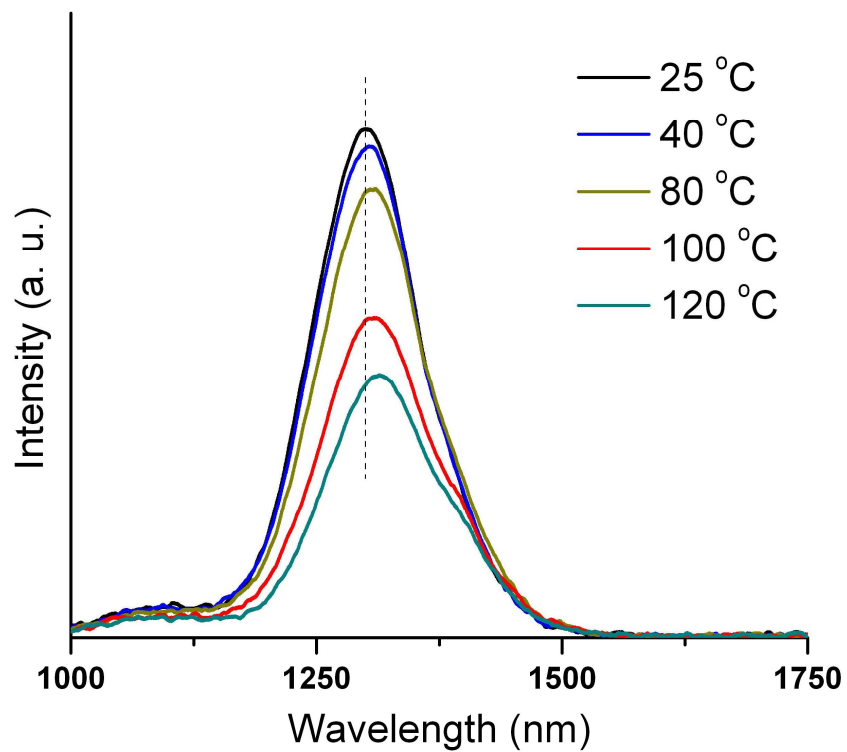

**Figure S1.** Temperature-induced shifts of photoluminescence spectra of the 3.9 nm PbSe nanocrystals.

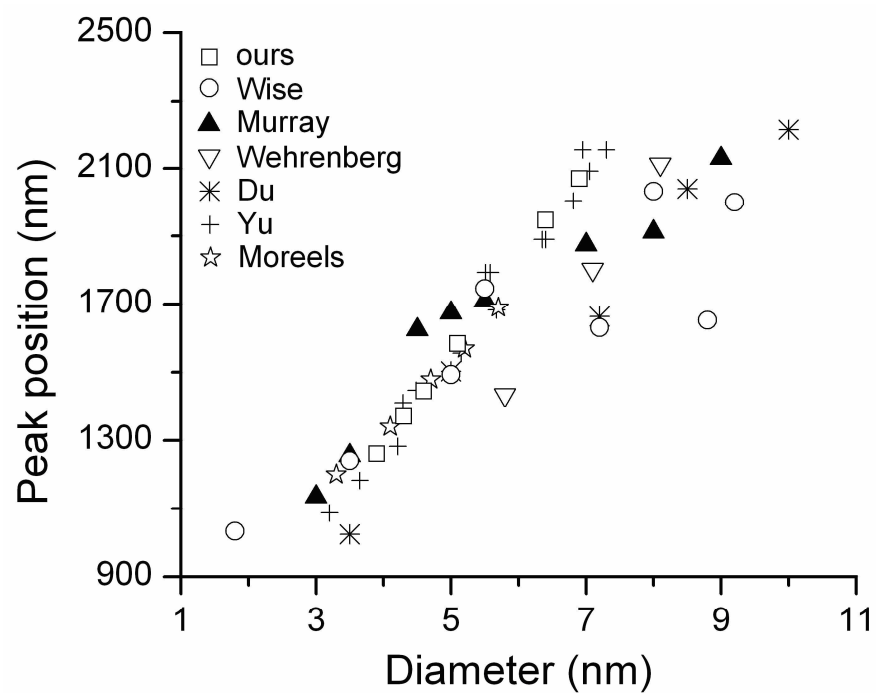

**Figure S2.** First absorption peak positions versus particle sizes of the PbSe nanocrystals collected from our experiment and the literature.<sup>1-6</sup>

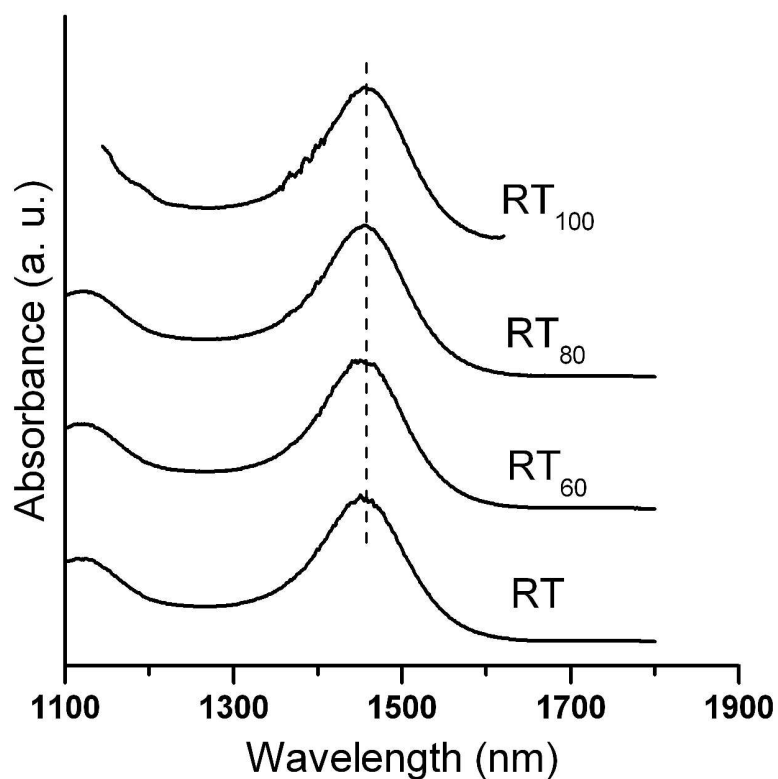

**Figure S3.** Room-temperature Measurements of absorption spectra of the PbSe nanocrystal sample before and after multiple heating/cooling cycles. We started the measurement of the sample at room temperature (marked as RT in the graph). Next, the sample was measured again, after being heated to 60 °C and then cooled down back to room temperature (marked as RT<sub>60</sub> in the graph). Subsequently, we measured the sample for the third and fourth times, after it was respectively heated to 80 °C and 100 °C and cooled down back to room temperature (marked as RT<sub>80</sub> and RT<sub>100</sub> in the graph).

## References

- (1) Moreels, I.; Lambert, K.; Muynck, D. D.; Vanhaecke, F.; Poelman, D.; Martins, J. C.; Allan, G.; Hens, Z. *Chem. Mater.* **2007**, *19*, 6101-6106.
- (2) Yu, W. W.; Falkner, J. C.; Shih, B. S.; Colvin, V. L. *Chem. Mater.* **2004**, *16*, 3318-3322.
- (3) Murray, C. B.; Sun, S.; Gaschler, W.; Doyle, H.; Betley, T. A.; Kagan, C. R. *IBM J. Res. Dev.* **2001**, *45*, 47-56.
- (4) Wehrenberg, B. L.; Wang, C.; Guyot-Sionnest, P. *J. Phys. Chem. B* **2002**, *106*, 10634-10640.
- (5) Du, H.; Chen, C.; Krishnan, R.; Krauss, T. D.; Harbold, J. M.; Wise, F. W.; Thomas, G.; Silcox, J. *Nano Lett.* **2002**, *2*, 1321-1324.
- (6) (a) Wise, F. W. *Acc. Chem. Res.* **2000**, *33*, 773-780. (b) Lipovskii, A.; Kolobkova, E.; Petrikov, V.; Kang, I.; Olkhovets, A.; Krauss, T.; Thomas, M.; Silcox, J.; Wise, F. W.; Shen, Q.; Kycia, S. *Appl. Phys. Lett.* **1997**, *71*, 3406-3408. (c) Olkhovets, A.; Hsu, R. C.; Lipovskii, A.; Wise, F. W. *Phys. Rev. Lett.* **1998**, *81*, 3539-3542.
